# Supplementary material for: Cell division promotes efficient retrotransposition in a stable L1 reporter cell line
Source: PubMed Central journal article supplement (PMC3607998; doi:10.1186/1759-8753-4-10), 2013-03-06

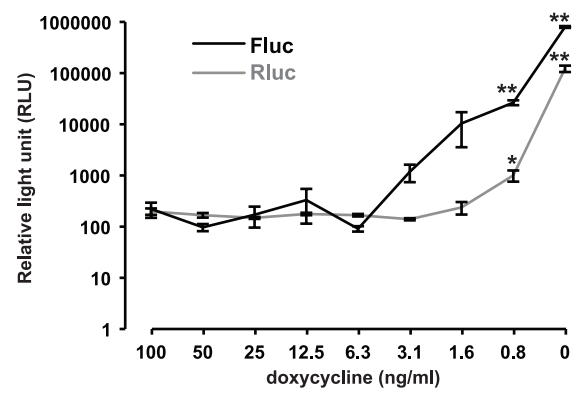

Supplement: 1759-8753-4-10-S2.pdf [file 1759-8753-4-10-S2.pdf]
